# Supplementary material for: Comprehensive analysis of the expression and prognosis for TNFAIPs in head and neck cancer
Source: PubMed Central journal article supplement (PMC8333337; doi:10.1038/s41598-021-95160-x), 2021-08-03
Supplement: 41598_2021_95160_MOESM1_ESM.pdf [file 41598_2021_95160_MOESM1_ESM.pdf]

## **Comprehensive analysis of the expression and prognosis for TNFAIPs in head and neck cancer**

Gaochen Lan<sup>1,3</sup>, Xiaoling Yu<sup>1,3</sup>, Xin Sun<sup>2</sup>, Wan Li<sup>1</sup>, Yanna Zhao<sup>1</sup>, Jinjian Lan<sup>1</sup>, Xiaolong Wu<sup>1</sup>, Ruilan Gao<sup>1\*</sup>

<sup>1</sup>Institute of Hematology Research, the First Affiliated Hospital of Zhejiang Chinese Medical University, Hangzhou, 310006, China.

<sup>2</sup>Department of Oncology, Zhejiang Provincial People's Hospital, Hangzhou, 310014, China.

<sup>3</sup>These authors contributed equally: Gaochen Lan and Xiaoling Yu.

\*Corresponding author: Dr. Ruilan Gao, the First Affiliated Hospital of Zhejiang Chinese Medical University, 54 Youdian Road, Hangzhou, 310006, China. E-mail: 19843009@zcmu.edu.cn.

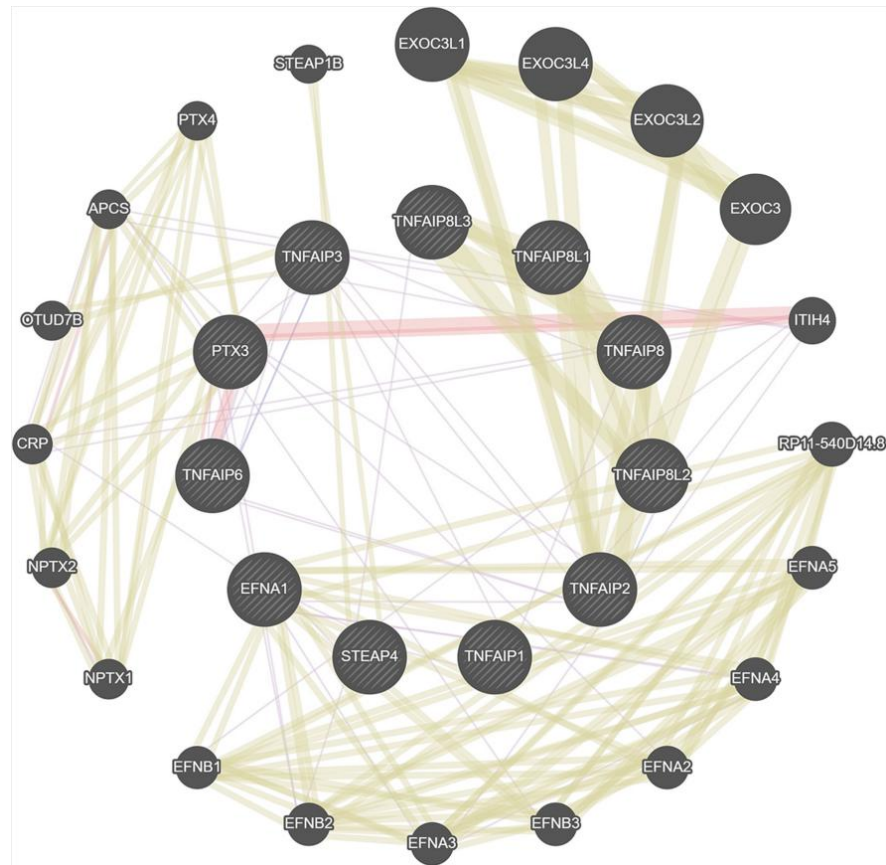

Supplementary Figure S1. The interaction network between TNFAIPs and their 20 associated genes. The red connection indicates physical interactions, the purple connection indicates co-expression, the blue connection indicates co-localization, and the yellow connection indicates protein domain similarity (GeneMANIA).

| Variables         | NO. | TNFAIP1 |          | TNFAIP2 |          | TNFAIP3 |          | EFNA1 |          | PTX3 |          | TNFAIP6 |          | TNFAIP8 |          | TNFAIP8L1 |          | TNFAIP8L2 |          | TNFAIP8L3 |          | STEAP4 |          |
|-------------------|-----|---------|----------|---------|----------|---------|----------|-------|----------|------|----------|---------|----------|---------|----------|-----------|----------|-----------|----------|-----------|----------|--------|----------|
|                   |     | mRNA    | P value  | mRNA    | P value  | mRNA    | P value  | mRNA  | P value  | mRNA | P value  | mRNA    | P value  | mRNA    | P value  | mRNA      | P value  | mRNA      | P value  | mRNA      | P value  | mRNA   | P value  |
| Pathology_T_stage |     |         | 0.340    |         | 6.67E-01 |         | 2.81E-01 |       | 4.09E-04 |      | 3.81E-01 |         | 4.61E-01 |         | 3.42E-02 |           | 1.30E-01 |           | 1.68E-03 |           | 9.16E-03 |        | 7.46E-02 |
| T1-T2             | 179 |         |          |         |          |         |          |       |          |      |          |         |          |         |          |           |          |           |          |           |          |        |          |
| T3-T4             | 269 |         |          |         |          |         | ↑        |       |          |      |          |         | ↓        |         |          |           |          | ↓         |          | ↓         |          |        |          |
| Pathology_N_stage |     |         | 7.03E-04 |         | 2.54E-01 |         | 9.15E-02 |       | 9.75E-02 |      | 2.15E-01 |         | 5.75E-01 |         | 1.77E-01 |           | 8.07E-01 |           | 4.39E-02 |           | 3.12E-02 |        | 3.93E-03 |
| N0                | 173 |         |          |         |          |         |          |       |          |      |          |         |          |         |          |           |          |           |          |           |          |        |          |
| N1-3              | 238 | ↓       |          |         |          |         |          |       |          |      |          |         |          |         |          |           |          | ↑         |          | ↓         |          | ↓      |          |
| Pathology_M_stage |     |         | 9.39E-01 |         | 2.78E-01 |         | 0.148    |       | 5.55E-01 |      | 2.02E-01 |         | 1.38E-01 |         | 9.85E-01 |           | 1.77E-01 |           | 0.238    |           | 9.85E-01 |        | 8.34E-01 |
| M0                | 181 |         |          |         |          |         |          |       |          |      |          |         |          |         |          |           |          |           |          |           |          |        |          |
| M1                | 1   |         |          |         |          |         |          |       |          |      |          |         |          |         |          |           |          |           |          |           |          |        |          |
| Pathologic stage  |     |         | 3.00E-01 |         | 4.65E-01 |         | 6.97E-01 |       | 2.68E-02 |      | 7.44E-01 |         | 5.96E-01 |         | 2.77E-02 |           | 2.53E-01 |           | 0.299    |           | 6.48E-03 |        | 1.83E-01 |
| I-II              | 100 |         |          |         |          |         |          |       |          |      |          |         |          |         |          |           |          |           |          |           |          |        |          |
| III-IV            | 339 |         |          |         |          |         | ↑        |       |          |      |          |         | ↓        |         |          |           |          |           |          | ↓         |          |        |          |
| Radiotherapy      |     |         | 2.65E-02 |         | 2.02E-02 |         | 7.01E-02 |       | 3.60E-03 |      | 2.51E-01 |         | 0.272    |         | 8.72E-01 |           | 3.87E-01 |           | 9.57E-01 |           | 2.57E-02 |        | 6.05E-03 |
| No                | 155 |         |          |         |          |         |          |       |          |      |          |         |          |         |          |           |          |           |          |           |          |        |          |
| Yes               | 296 | ↓       |          | ↑       |          |         | ↑        |       |          |      |          |         |          |         |          |           |          |           |          | ↓         |          | ↓      |          |

Supplementary Table S1. The relationship between the mRNA levels of TNFAIPs and clinicopathological parameters in HNC patients; ↑ and ↓ represents upregulation and downregulation, respectively (LinkedOmics).

|           | Coef   | HR    | 95%CI_l | 95%CI_u | P-value | Sig |
|-----------|--------|-------|---------|---------|---------|-----|
| B cell    | -2.124 | 0.120 | 0.015   | 0.947   | 0.044   | *   |
| PTX3      | 0.178  | 1.195 | 1.061   | 1.346   | 0.003   | **  |
| TNFAIP6   | 0.039  | 1.040 | 0.919   | 1.177   | 0.536   |     |
| TNFAIP8L2 | -0.095 | 0.909 | 0.767   | 1.078   | 0.273   |     |

Supplementary Table S2. The cox proportional hazard model of immune cell infiltration levels and TNFAIP expression levels in HNC.

HR, hazard ratio; CI\_l, lower confidence interval; CI\_u, upper confidence interval; \*P<0.05, \*\*P<0.01 (TIMER).
